# Supplementary material
Source: Springer Nature journal article supplement (https://www.springermedizin.de/resource/supplementary/12967_2013_2096_MOESM3_ESM.pdf/9575318)

**MICROALBUMIN**  
Albumin

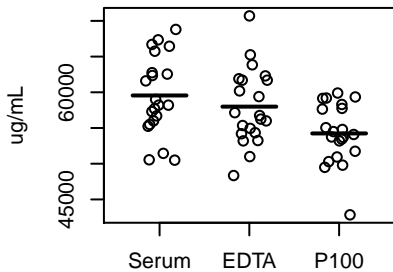

**FABP3**  
HCVD4

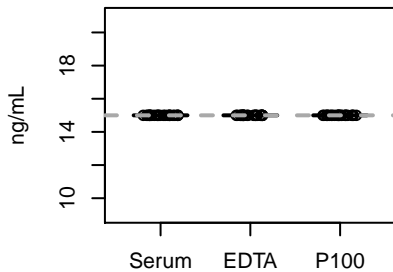

**OLR1**  
HCVD4

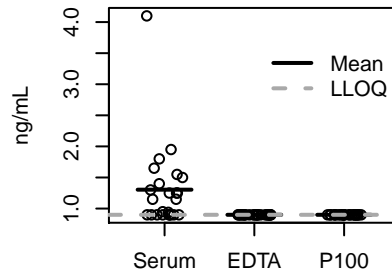

**MDA\_LDL**  
HCVD4

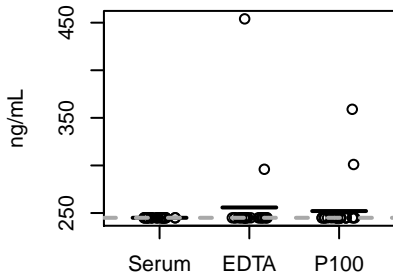

**NPPB\_PH**  
HCVD4

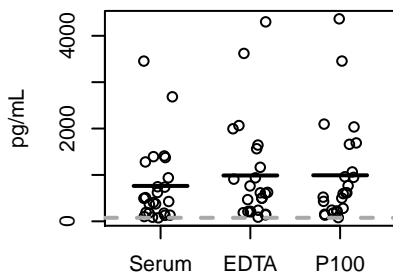

**THBD**  
HCVD4

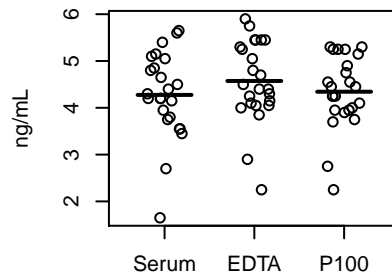

**A2M**  
HMP8

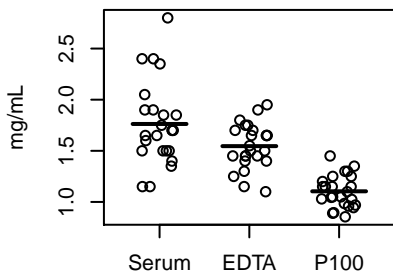

**ADIPOQ**  
HMP8

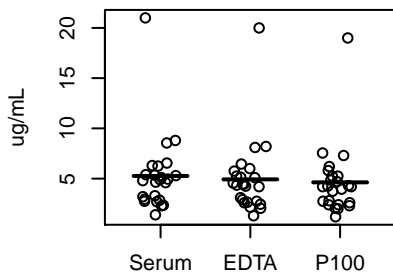

**B2M**  
HMP8

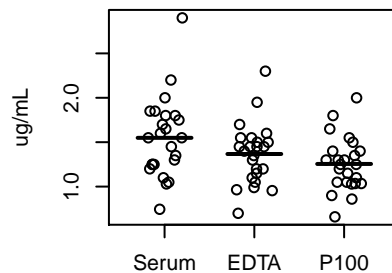

**FTL\_FTH1**  
HMP8

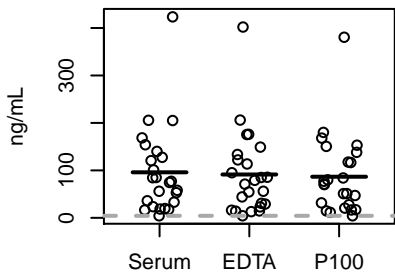

**MB**  
HMP8

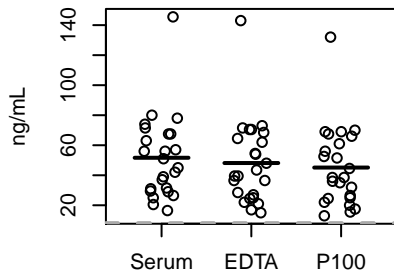

**SERPINE1**  
HMP8

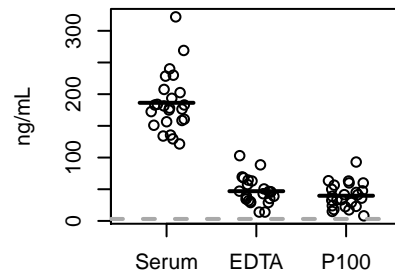

**CCL5**  
HMP8

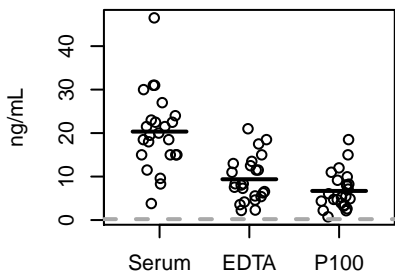

**TIMP1**  
HMP8

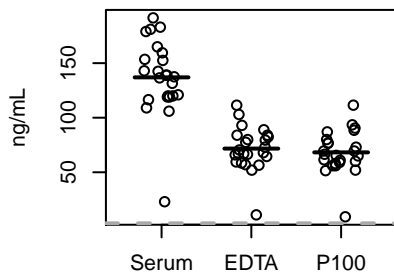

**TNFRSF1B**  
HMP8

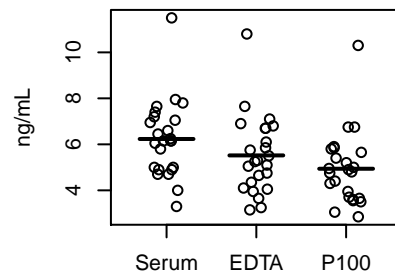

**VCAM1**  
HMP8

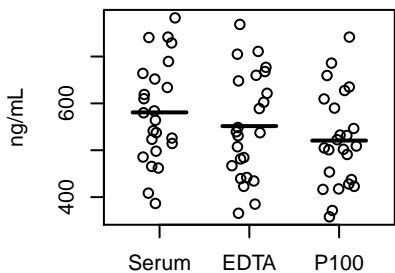

**AXL**  
HMPC19

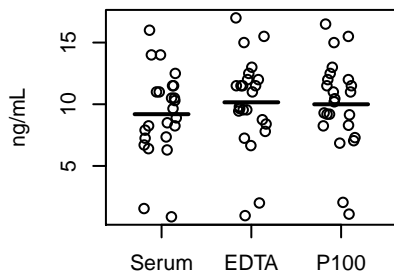

**FAS**  
HMPC19

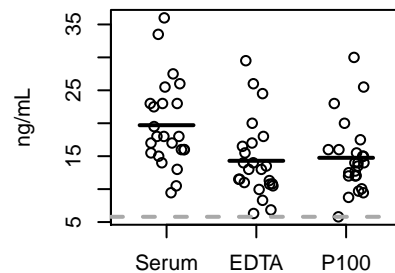

**CCL16**  
HMPC19

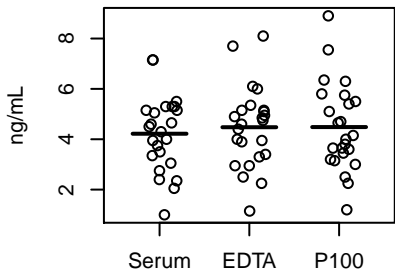

**HGF**  
HMPC19

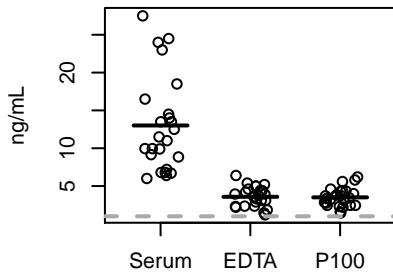

**CCL18**  
HMPC19

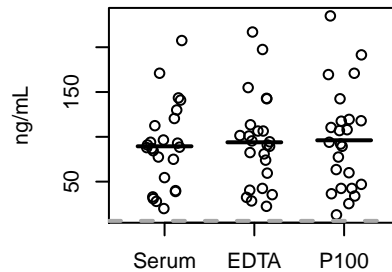

**TNFRSF10C**  
HMPC19

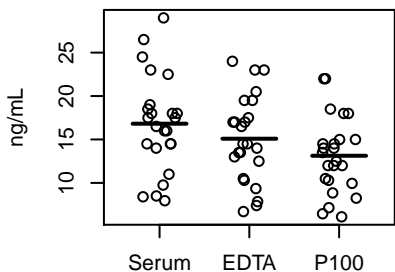

**CHGA**  
HMPC35

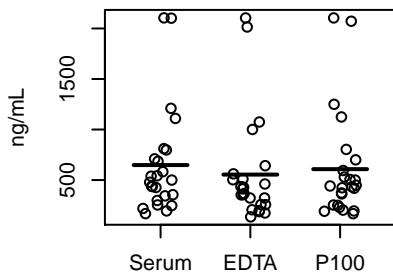

**NGF**  
HMPC35

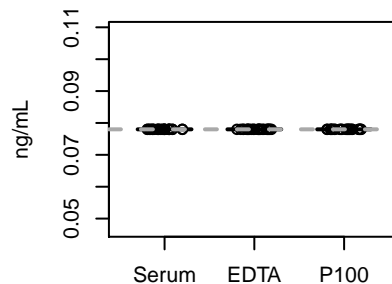

**NRCAM**  
HMPC35

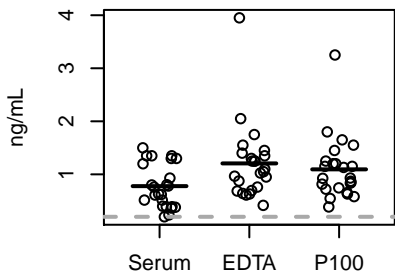

**AGER**  
HMPC35

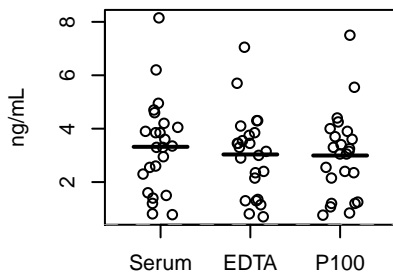

**S100B**  
HMPC35

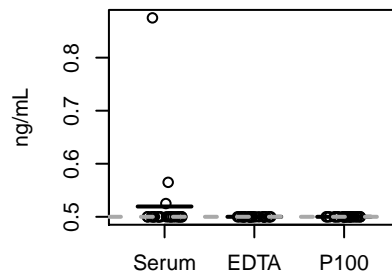

**SOD1**  
HMPC35

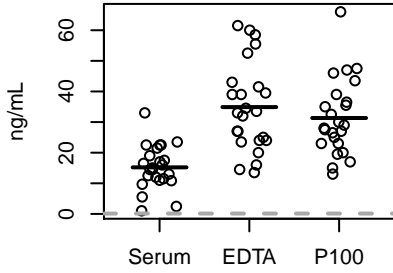

**SORT1**  
HMPC35

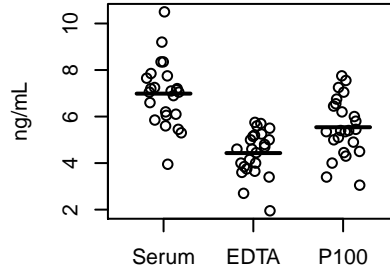

**SELE**  
HMPC42

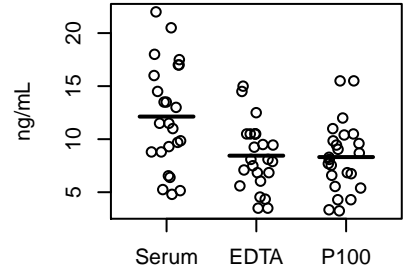

**IL6R**  
HMPC42

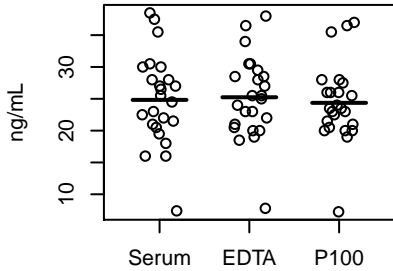

**CXCL10**  
HMPC42

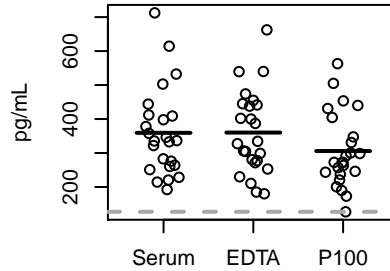

**CCL8**  
HMPC42

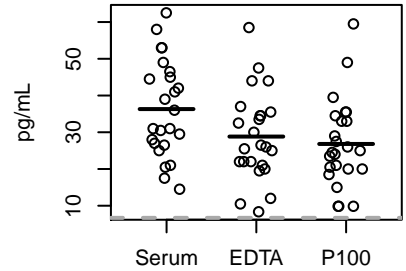

**CCL13**  
HMPC42

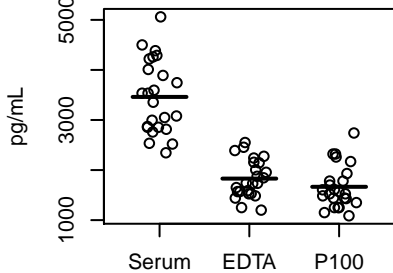

**CXCL9**  
HMPC42

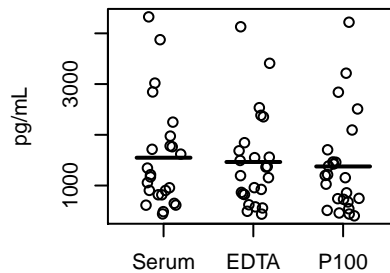

**CCL20**  
HMPC42

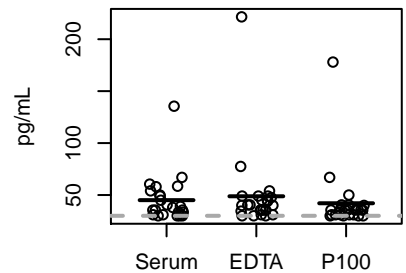

**CCL23**  
HMPC42

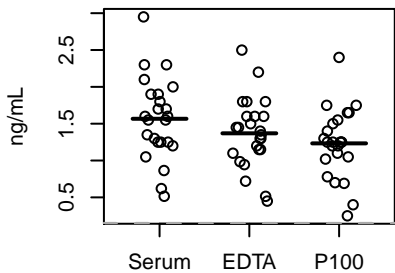

**SERPINA3**  
HMPC49

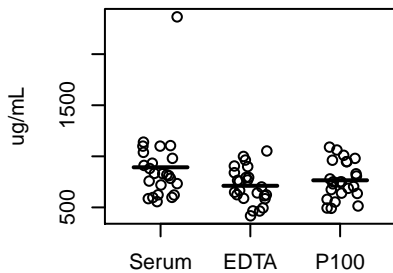

**APOA4**  
HMPC49

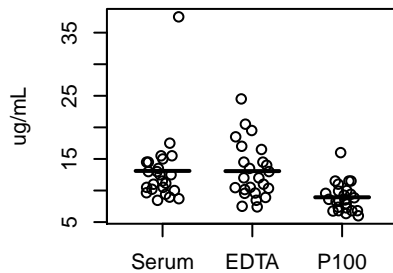

**HSPD1**  
HMPC49

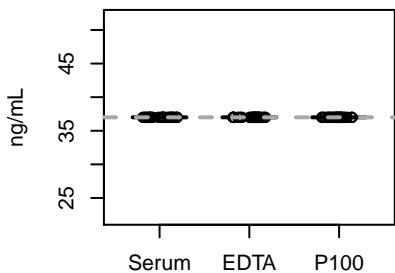

**INS\_intact**  
HMPC49

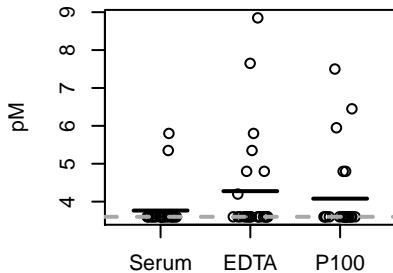

**INS\_total**  
HMPC49

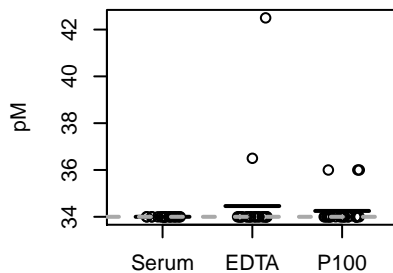

**CCL24**  
HMPC62

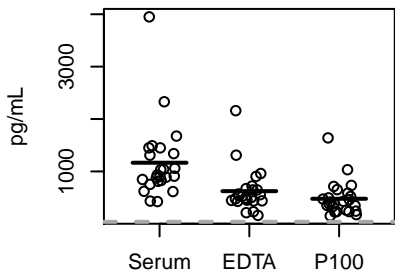

**IL2RA**  
HMPC62

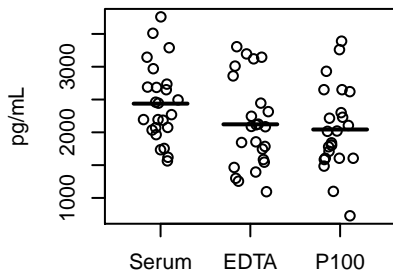

**TGFB1\_LAP**  
HMPC62

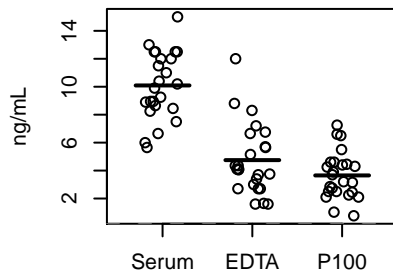

**MICA**  
HMPC62

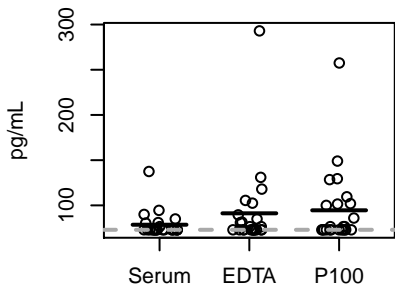

**TNFRSF11B**  
HMPC62

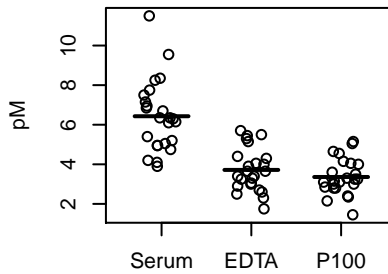

**TNFRSF1A**  
HMPC62

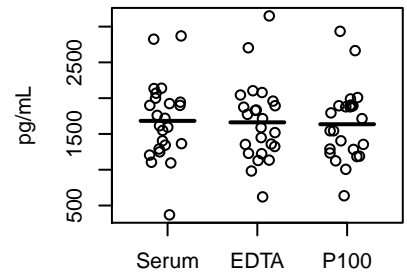

**ANGPT1**  
HMPC83

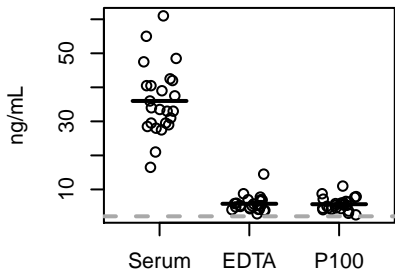

**CA9**  
HMPC83

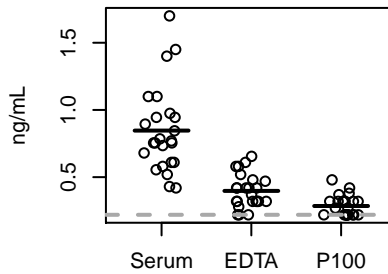

**CEACAM1**  
HMPC83

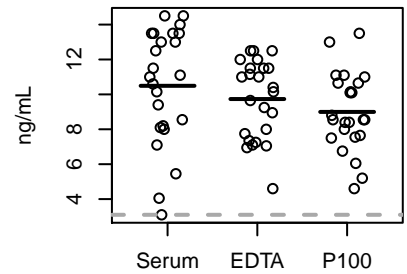

**DCN**  
HMPC83

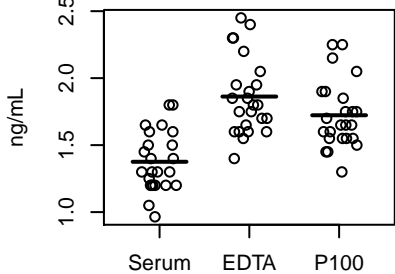

**IL18BP**  
HMPC83

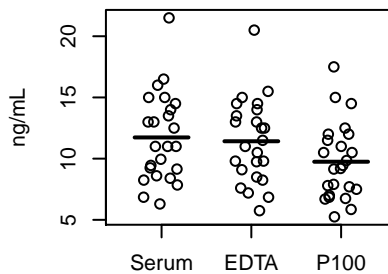

**MDK**  
HMPC83

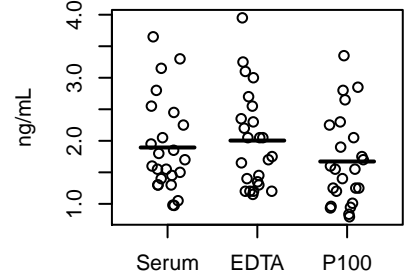

**PECAM1**  
HMPC83

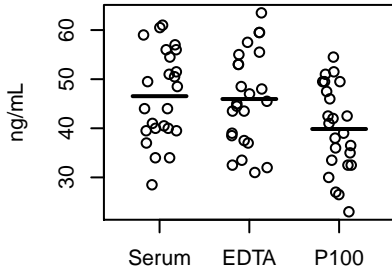

**SFTPD**  
HMPC83

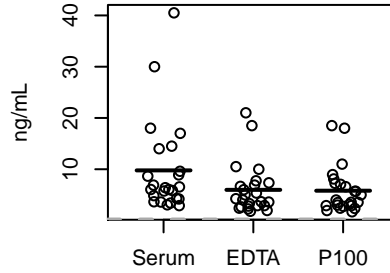

**CDH13**  
HMPC83

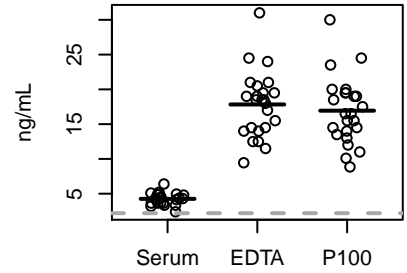

**SLPI**  
HMPC84

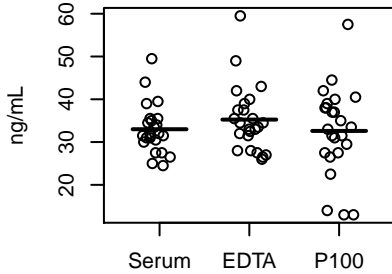

**CSTB**  
HMPC84

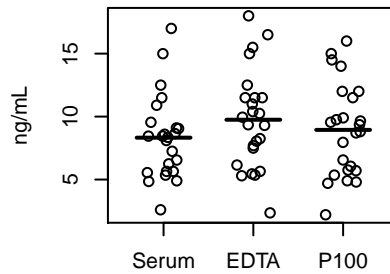

**CDH1**  
HMPC84

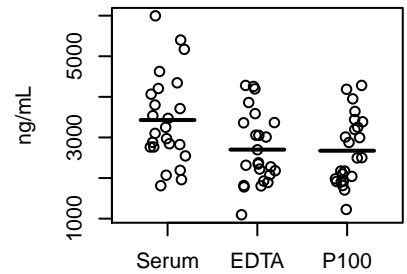

**LTF**  
HMPC84

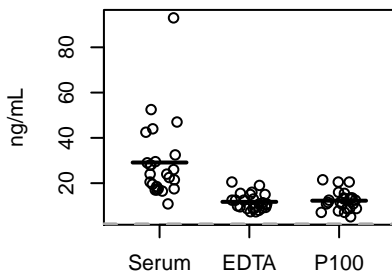

**KIT**  
HMPC84

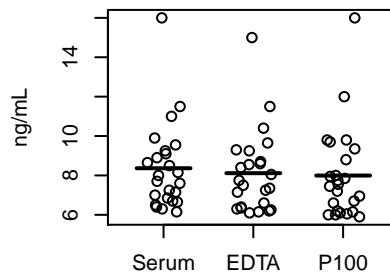

**SPINK1**  
HMPC84

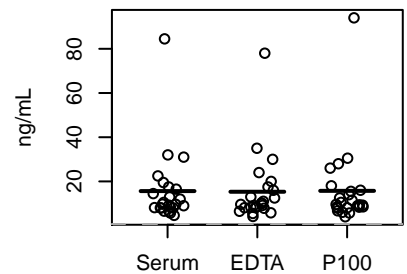

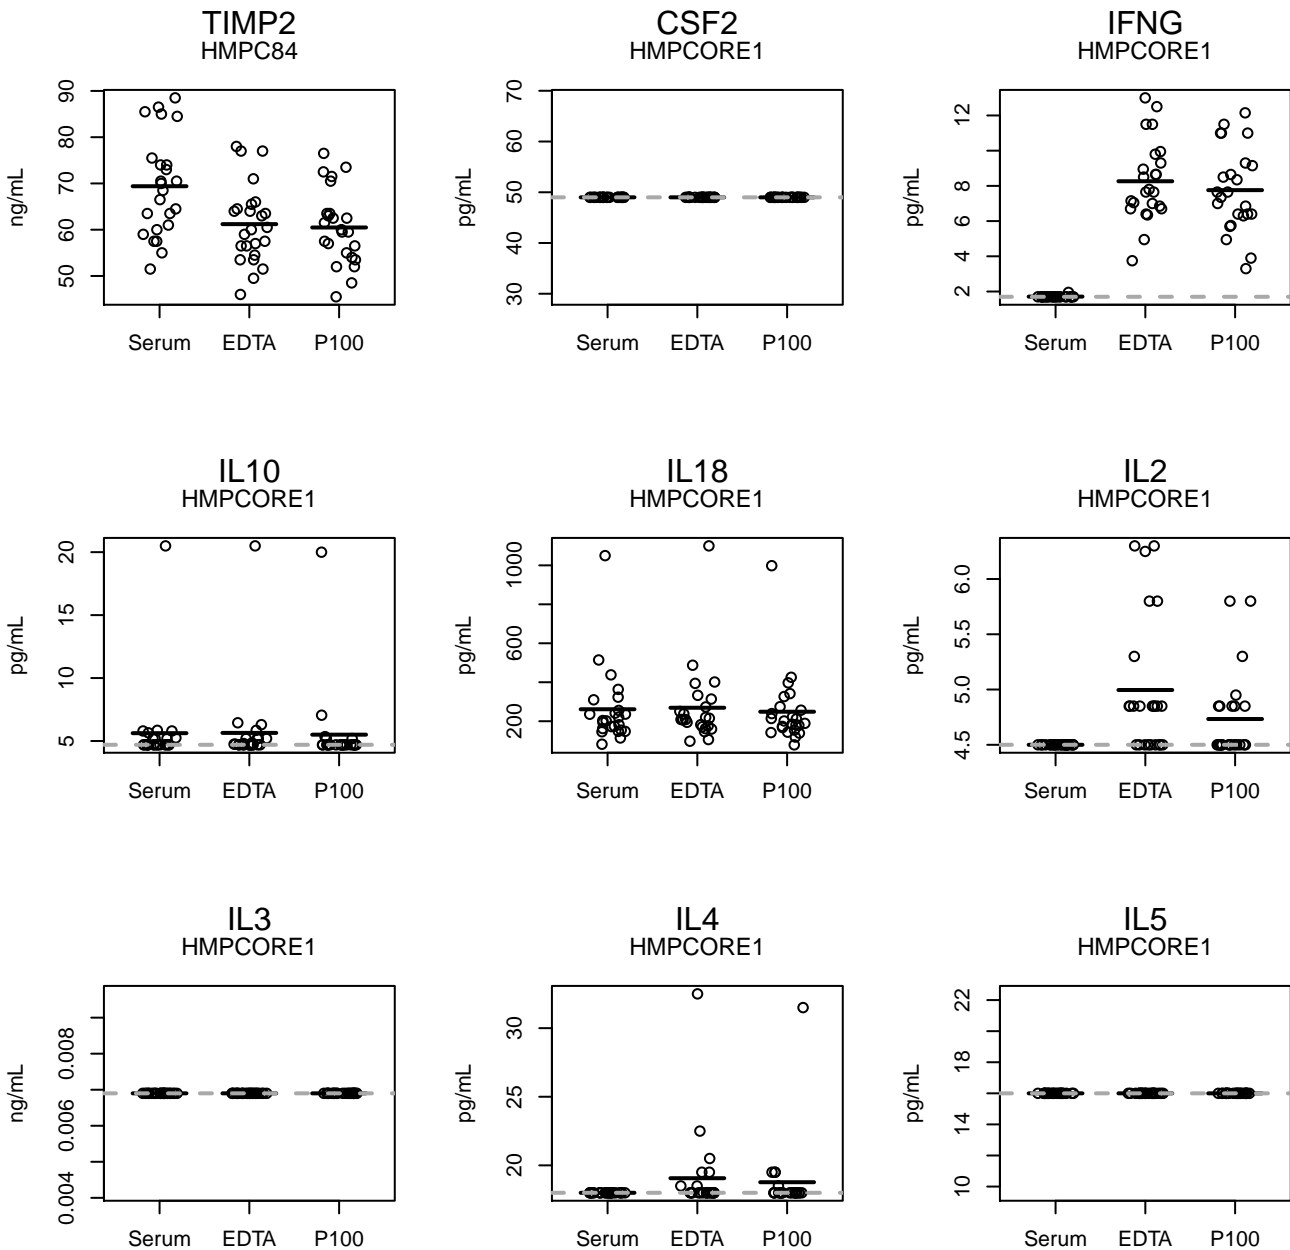



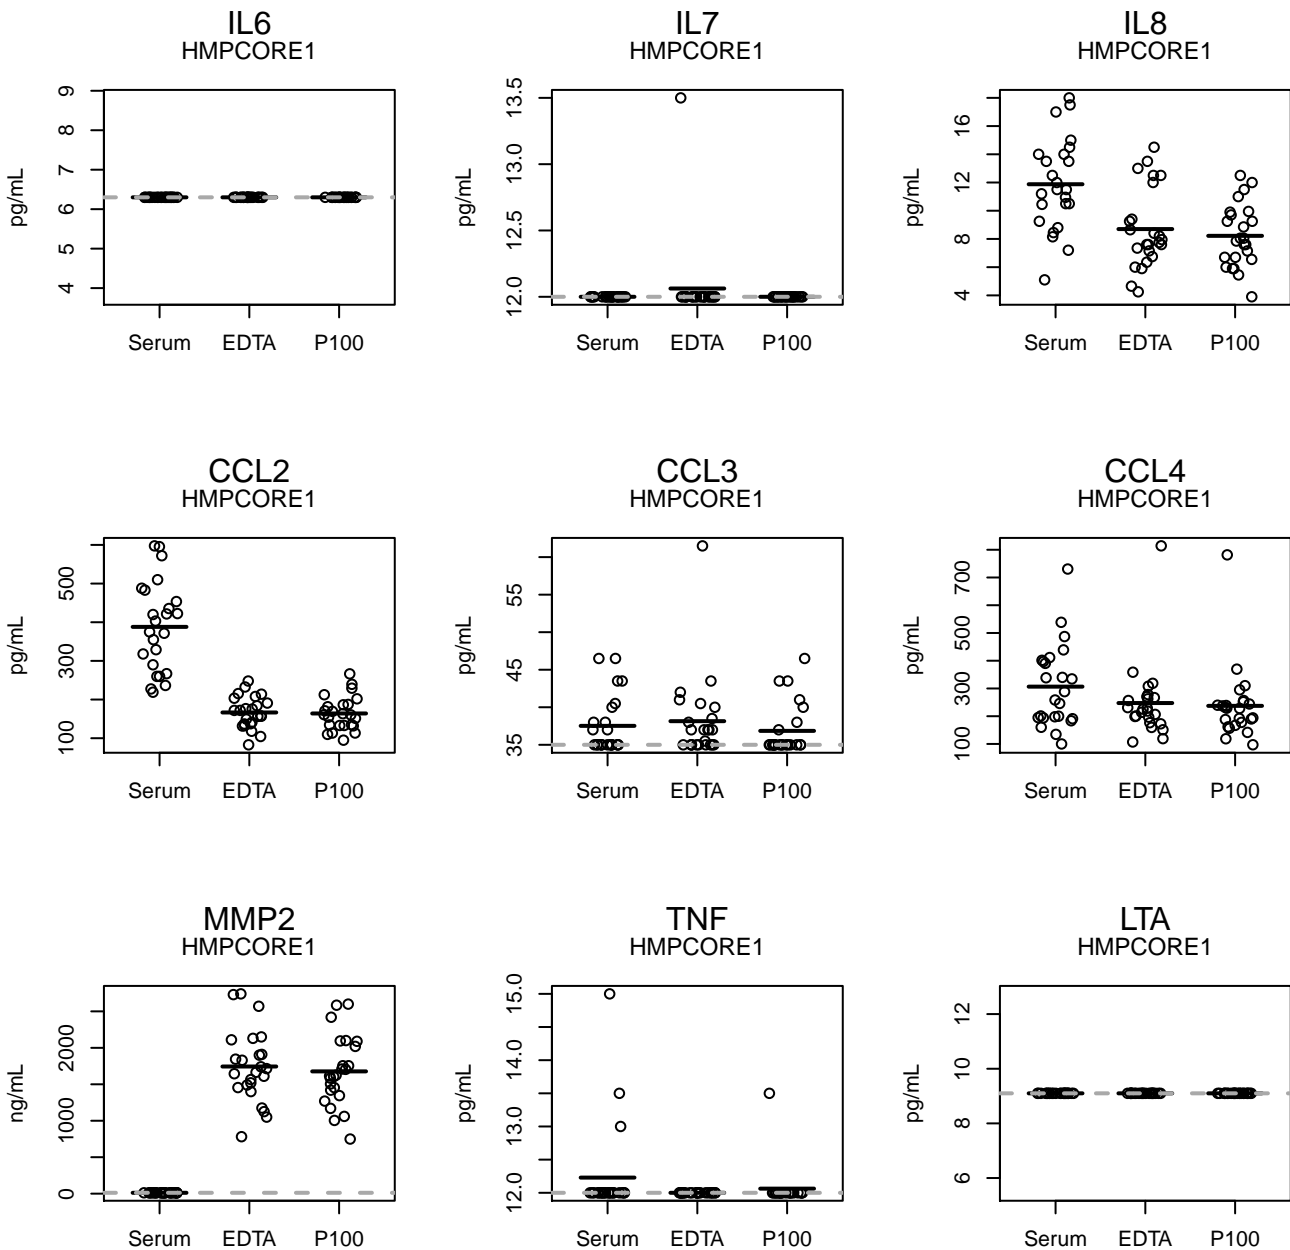

**BDNF**  
HMPCORE2

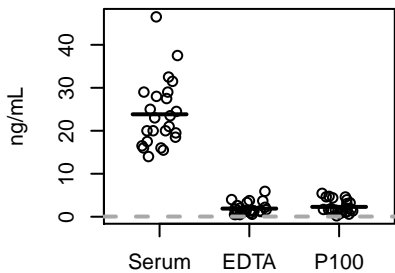

**CCL11**  
HMPCORE2

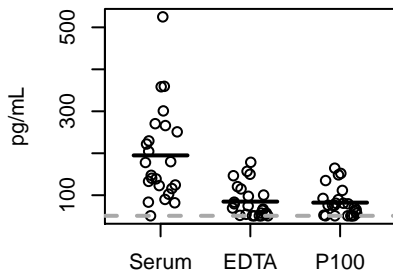

**F7**  
HMPCORE2

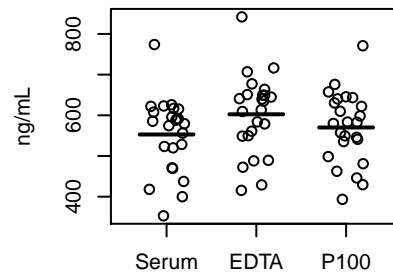

**ICAM1**  
HMPCORE2

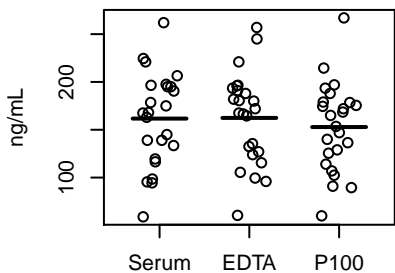

**IL12B**  
HMPCORE2

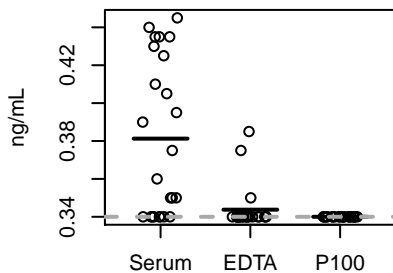

**IL12A\_IL12B**  
HMPCORE2

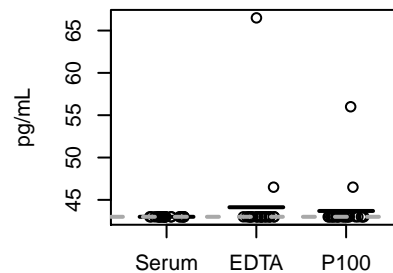

**IL15**  
HMPCORE2

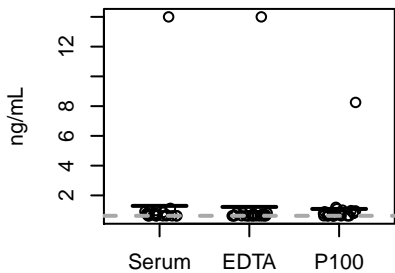

**IL17A**  
HMPCORE2

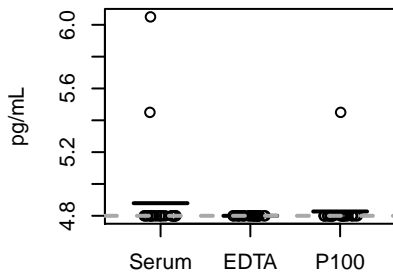

**IL1A**  
HMPCORE2

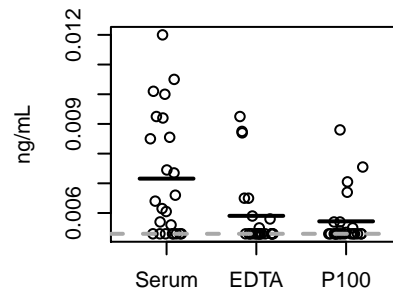

**IL1B**  
HMPCORE2

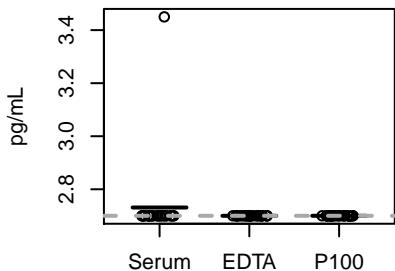

**IL1RN**  
HMPCORE2

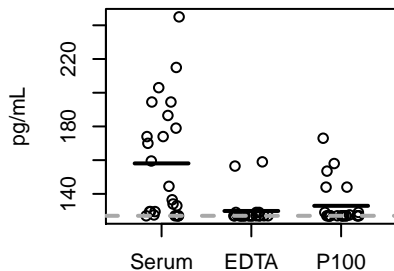

**IL23A**  
HMPCORE2

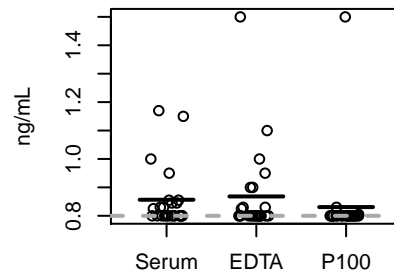

**MMP3**  
HMPCORE2

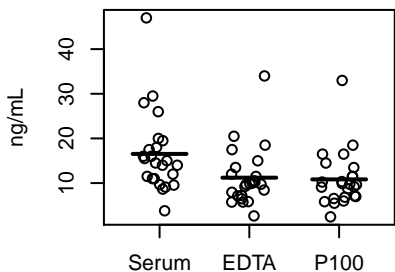

**MMP9**  
HMPCORE2

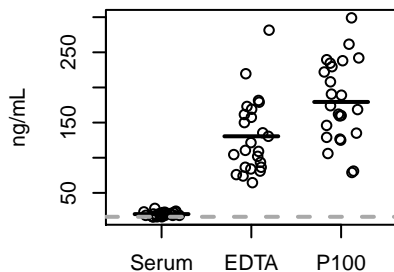

**KITLG**  
HMPCORE2

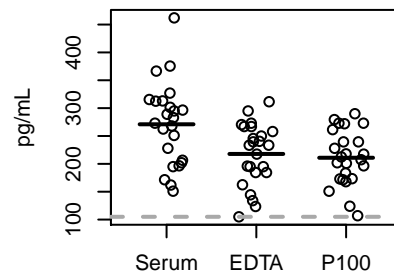

**VEGFA**  
HMPCORE2

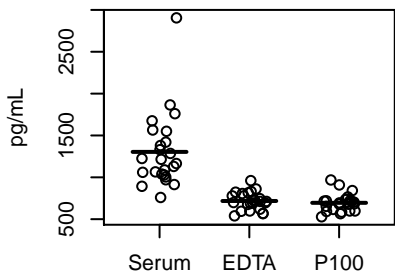

**SERPINA1**  
HMPCORE4

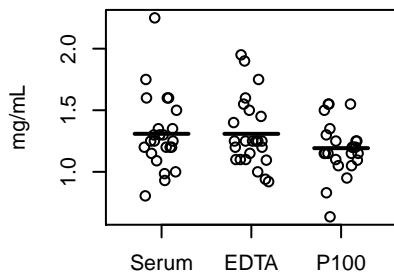

**C3**  
HMPCORE4

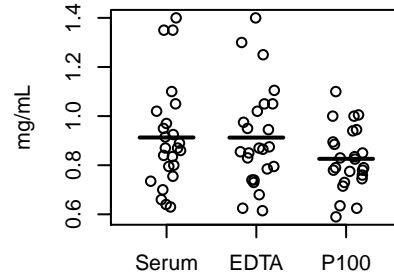

CRP  
HMPCORE4

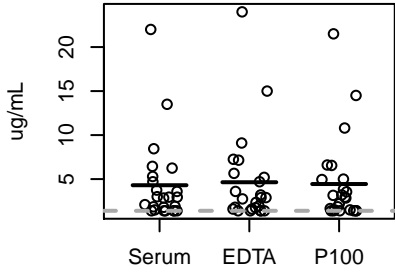

FGA\_FGB\_FGG  
HMPCORE4

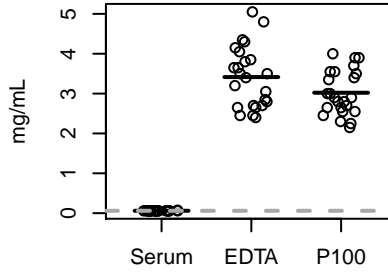

HP  
HMPCORE4

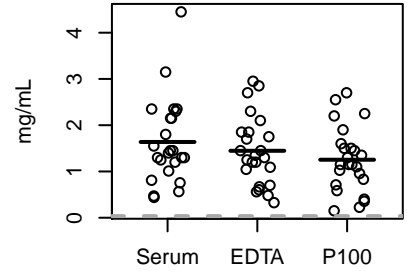

IgA  
HMPCORE4

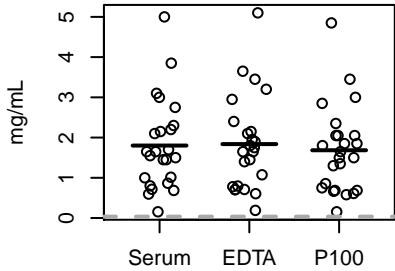

IgM  
HMPCORE4

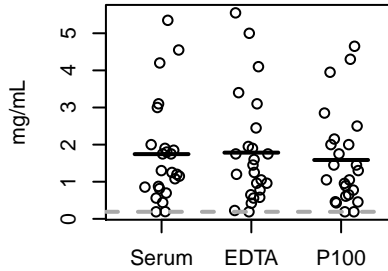

GC  
HMPCORE4

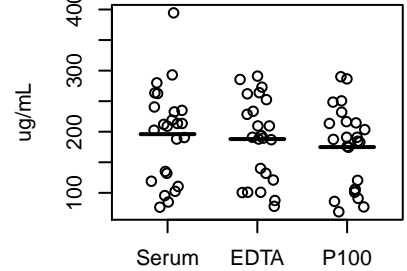

Supplement: MOESM3 [file 9575318]
